# Supplementary material for: Expression of the Heterotrimeric GP2/GP3/GP4 Spike of an Arterivirus in Mammalian Cells
Source: MDPI journal article supplement (doi:10.3390/v14040749), 2022-04-01
Supplement: s1 [file s1]

Manders' overlap coefficient

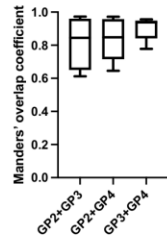

Transfection with pGP2/GP3/GP4

Pearson's correlation coefficient

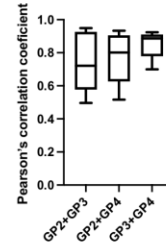

Transfection with pGP2/GP3/GP4

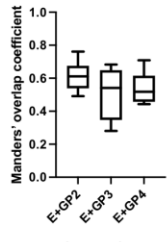

Co-transfection  
E and GP2/GP3/GP4

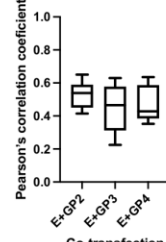

Co-transfection  
E and GP2/GP3/GP4

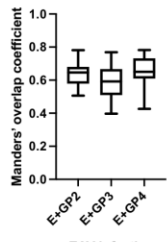

EAV infection  
+  
GP2/GP3/GP4 transfection

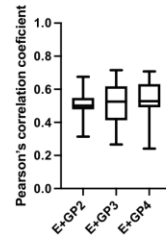

EAV infection  
+  
GP2/GP3/GP4 transfection

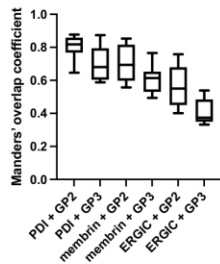

Transfection with pGP2/GP3/GP4

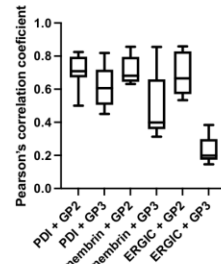

Transfection with pGP2/GP3/GP4

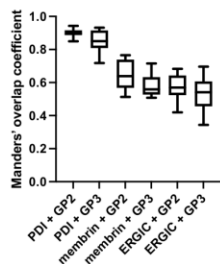

Transfection with plasmid containing  
one gene only GP2 or GP3

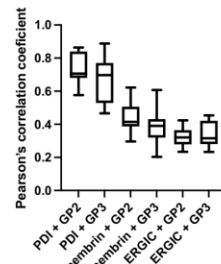

Transfection with plasmid containing  
one gene only GP2 or GP3

**Figure S2:** Comparison of the co-localization graphs of Manders' overlap coefficients and Pearson's correlation coefficients.
