# Supplementary material for: Expression of the Heterotrimeric GP2/GP3/GP4 Spike of an Arterivirus in Mammalian Cells
Source: MDPI journal article supplement (doi:10.3390/v14040749), 2022-04-01
Supplement: s1 [file s1]

**Table S1:** Oligonucleotides used for this study.

| Primer name     | Sequence 5' > 3'                                                                         | Purpose                                                            |
|-----------------|------------------------------------------------------------------------------------------|--------------------------------------------------------------------|
| EML FOR         | GCTTACACGCGTATGGGCTTAGTGTGGTC                                                            | Primer for cloning E gene into pML-DAZ2                            |
| EML REV         | GTAAGCTCTAGATTAAACAGGTCTGTAACG                                                           | Primer for cloning E gene into pML-DAZ2                            |
| EXhoEcoFor      | GATCCTCGAGGAATTCATGGGCTTAGTGTGG                                                          | Primer for cloning E into pMDK                                     |
| EMluKpnRev      | GATCGGTACCACGCGTTTAAACAGGTCTGTAA<br>C                                                    | Primer for cloning E into pMDK                                     |
| GP3HAXhoBamFor  | GCTTACGGATCCCTCGAGATGGGTCGTG                                                             | Primer for cloning into pMDS                                       |
| GP3HAXbaKpnRev  | GATCGGTACCTCTAGATTAAAGCGTAGTC                                                            | Primer for cloning into pMDS                                       |
| GP2XhoBamFor    | GATCGGATCCCTCGAGACGCGTATGC                                                               | Cloning GP2-myc into pMDC and pMDK                                 |
| GP2SmaXbaRev    | GCTTACTCTAGACCCGGGCTACAGATCTTCTT<br>CAGAAATAAGTTTTTGCTCCAAAATCTTGCGC                     | Addition of the tag and cloning of GP2-myc into pMDC               |
| GP2mycMluKpnRev | GATCGGTACCACGCGTCTACAGATCTTCTTCA<br>G                                                    | Primer for subcloning GP2-myc into pMDK                            |
| GP4XhoMluFor    | GCTTACCTCGAGACGCGTATGAAGATCTACG<br>GCTGC                                                 | Primer for cloning GP4 into pACEMam2                               |
| Gp4KpnSmaRev    | GCTTACGGTACCCCCGGGCTACTTGTCATCGT<br>CGTCCTTGTAAGTCTAGATAACATCGTTGAGC                     | Primer for addition of FLAG tag and cloning into pACEMam2          |
| GP4KpnHindRev   | GATCTAAAGCTTGGTACCCTATTACTTGTCAT<br>CGTCGTCCTTGTAAGTTCGGTGGCGACCGGTGGA<br>TCC            | Primer for adding linker to FLAG tag GP4 and cloning into pACEMam2 |
| GP4linkerV5Rev  | GTAAGCAAGCTTGGTACCTTACGTAGAATCG<br>AGACCGAGGAGAGGGTTAGGGAT<br>AGGCTTACCGGTGGCGACCGGTGGAT | Primer for exchanging tag to V5 in GP4 and cloning into pACEMam2   |
