# Supplementary material for: Expression of the Heterotrimeric GP2/GP3/GP4 Spike of an Arterivirus in Mammalian Cells
Source: Viruses. 2022 Apr 1;14(4):749. doi: 10.3390/v14040749 (PMC9030998; doi:10.3390/v14040749)
Supplement: Supplementary file 1 [file viruses-14-00749-s001.zip]

Archive with 5 entries (5 files):
- viruses-1583782-supplementary-revised/Figure S1.pdf
- viruses-1583782-supplementary-revised/Figure S1.tif
- viruses-1583782-supplementary-revised/Figure S2.pdf
- viruses-1583782-supplementary-revised/Figure S2.tiff
- viruses-1583782-supplementary-revised/Supplementary Table S1 MultiMam R1.pdf
