# Supplementary figures and images for: Expression of the Heterotrimeric GP2/GP3/GP4 Spike of an Arterivirus in Mammalian Cells
Source: MDPI journal article supplement (doi:10.3390/v14040749), 2022-04-01

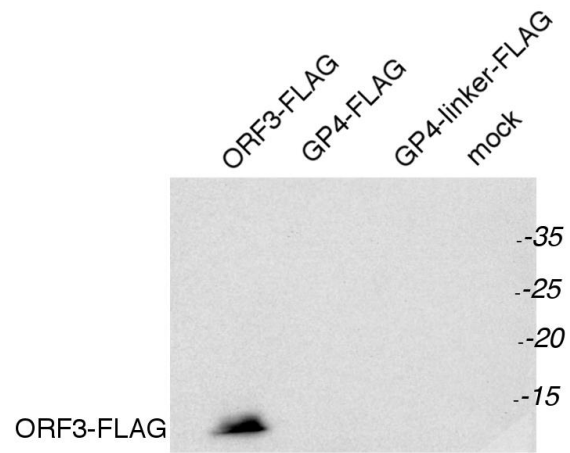

**Figure S1:** Expression of the GP4 with FLAG tag.

Supplement: s1 [file s1]
